# Supplementary material for: Transmission dynamics of pandemic influenza A(H1N1)pdm09 virus in humans and swine in backyard farms in Tumbes, Peru
Source: PubMed Central journal article supplement (PMC4687498; doi:10.1111/irv.12329), 2015-12-11

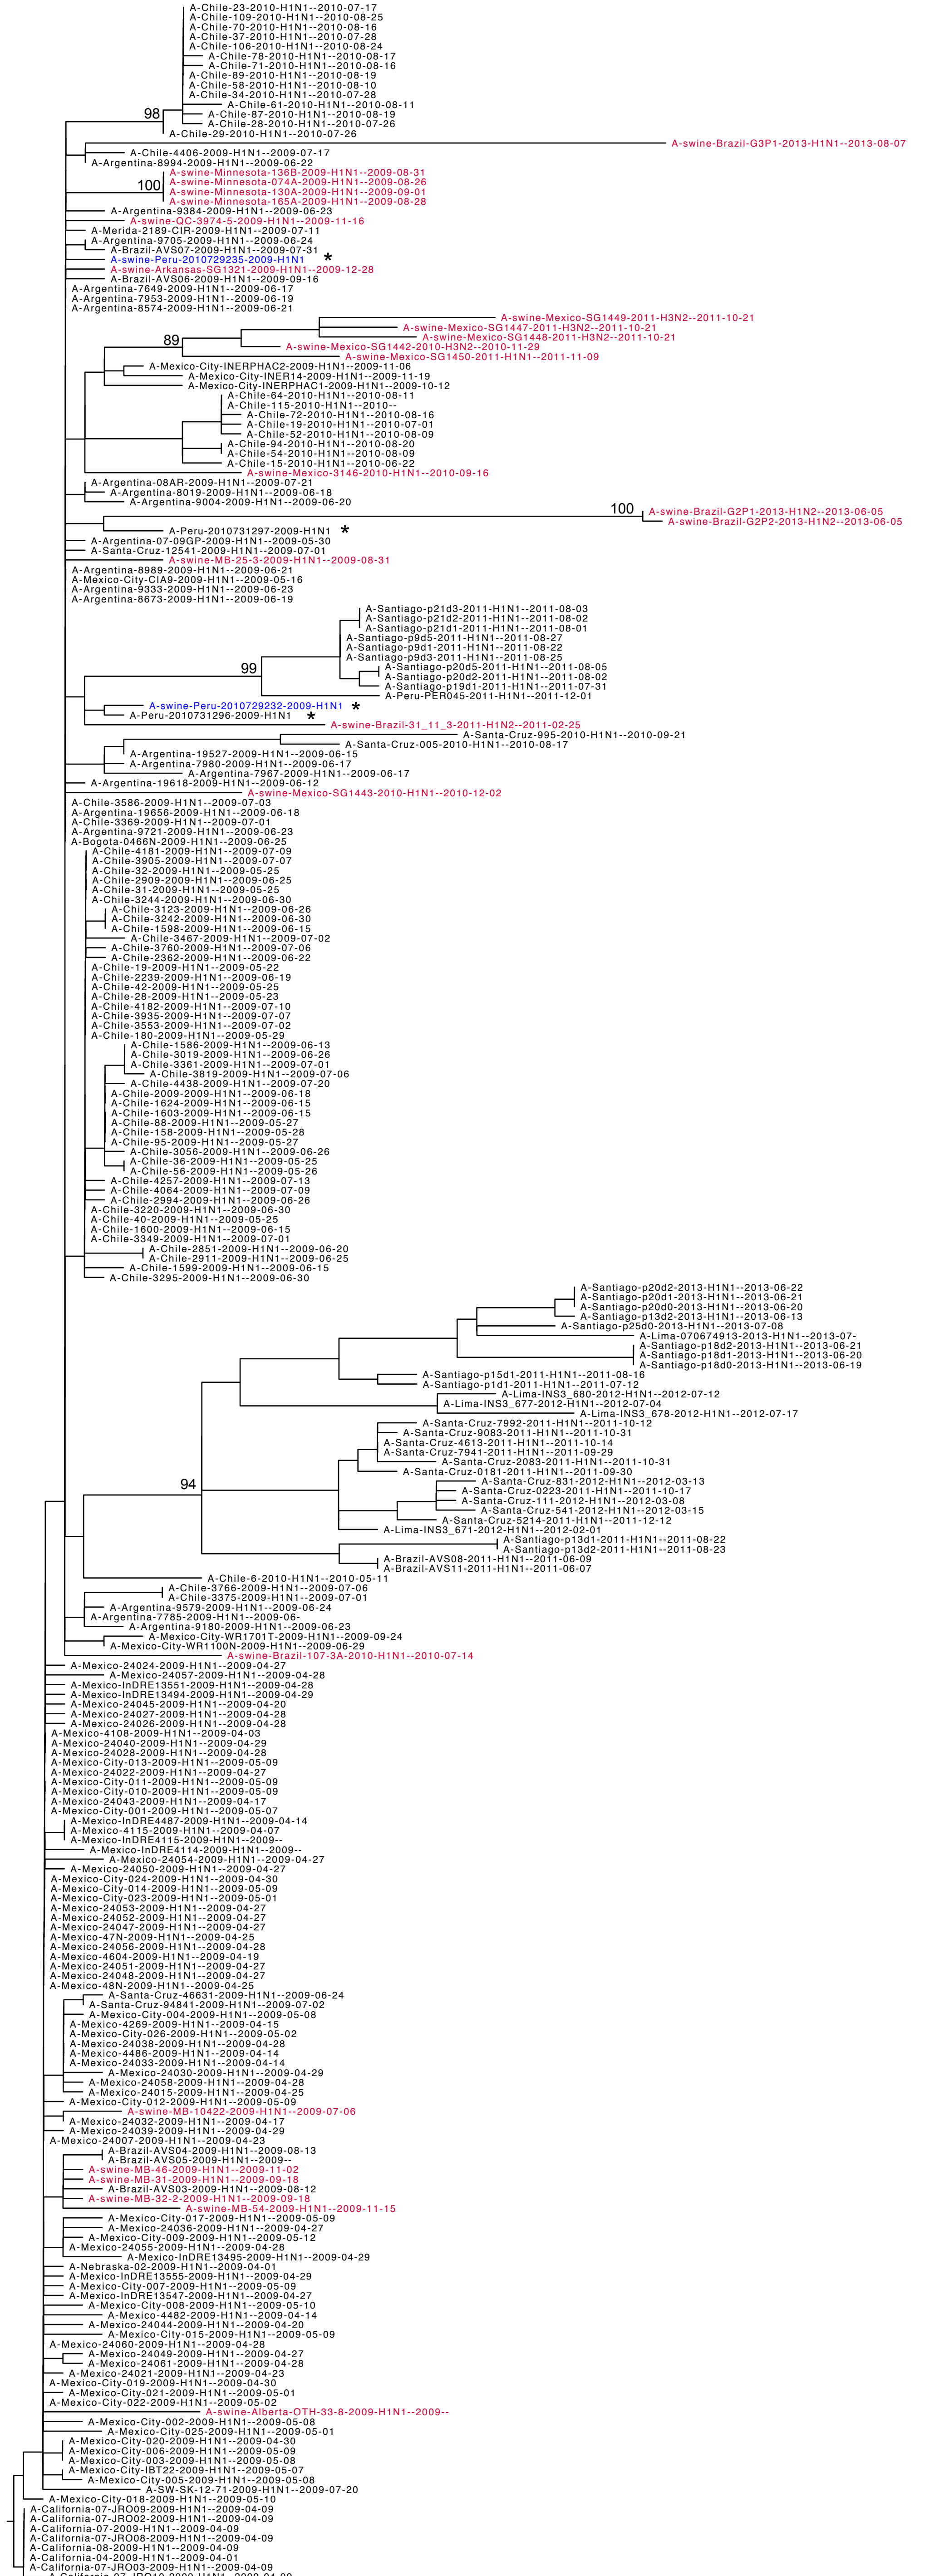

Supplement: IRV-10-47-s001.pdf [file IRV-10-47-s001.pdf]
