# Supplementary material for: Transmission dynamics of pandemic influenza A(H1N1)pdm09 virus in humans and swine in backyard farms in Tumbes, Peru
Source: PubMed Central journal article supplement (PMC4687498; doi:10.1111/irv.12329), 2015-12-11
Supplement: IRV-10-47-s006.pdf [file IRV-10-47-s006.pdf]

Phylogenetic tree showing relationships between various taxa, including A. swine, A. hawaii, A. mex, and A. arg. The tree is rooted at the bottom and branches upwards. Major clades are labeled with numbers 70, 76, 87, 89, 90, 95, and 98. The tree includes numerous accession numbers and dates, such as KJ86909.1, KJ86910.1, KJ86911.1, etc., and dates like 2014-02-21, 2014-01-17, etc. The taxa are listed in a hierarchical manner, with some clades highlighted in bold. The tree shows a complex branching pattern, indicating a diverse and well-resolved phylogeny. The labels are in a small font and are densely packed, especially in the lower and middle sections of the tree. The overall structure is a large, bushy tree with many tips, representing a wide range of genetic diversity within the species being studied.
